# Supplementary material
Source: MDPI journal article supplement (https://www.mdpi.com/2071-1050/16/6/2532)
Supplement: s1 [file s1]

## (Micro-)plastics in saturated and unsaturated groundwater bodies: first evidence of presence in groundwater fauna and habitats

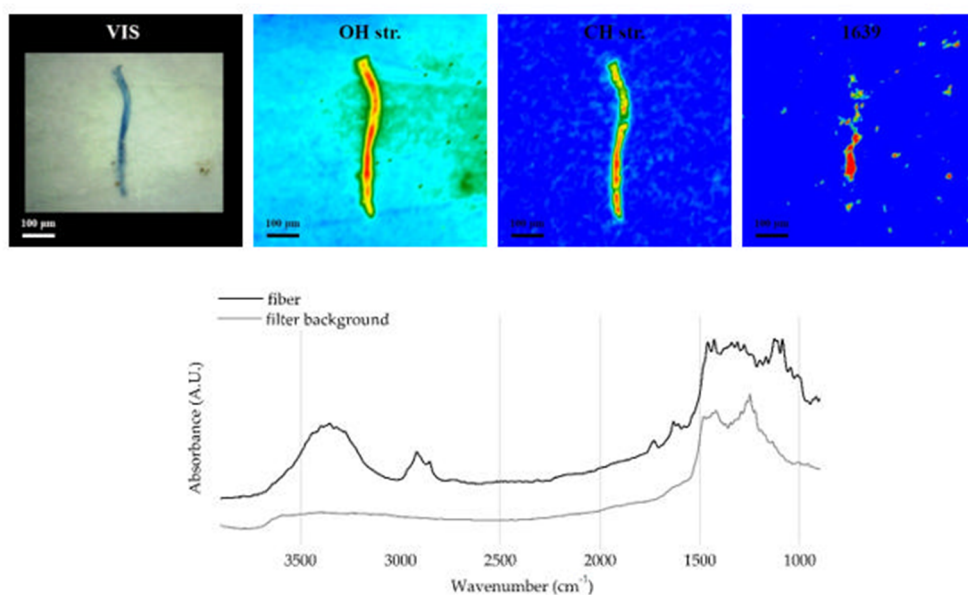

**Figure S1.** (From the left) Visible light and 2D FTIR Imaging maps of a fiber identified as textile/artificial cellulose owing to absorption 3500-3000 cm<sup>-1</sup> (OH stretching), 3000-2800 cm<sup>-1</sup> (CH stretching), 1727 cm<sup>-1</sup> (C=O stretching), 1639 cm<sup>-1</sup> (adsorbed water), 1459 and 1434 cm<sup>-1</sup> (CH bending), and 1091 cm<sup>-1</sup> (C-OH stretching) [91]. (Bottom) FTIR Reflectance spectra of the polymer fiber and of the filter background, relating to a single pixel (5.5 × 5.5 μm<sup>2</sup>) of the 2D Imaging map.

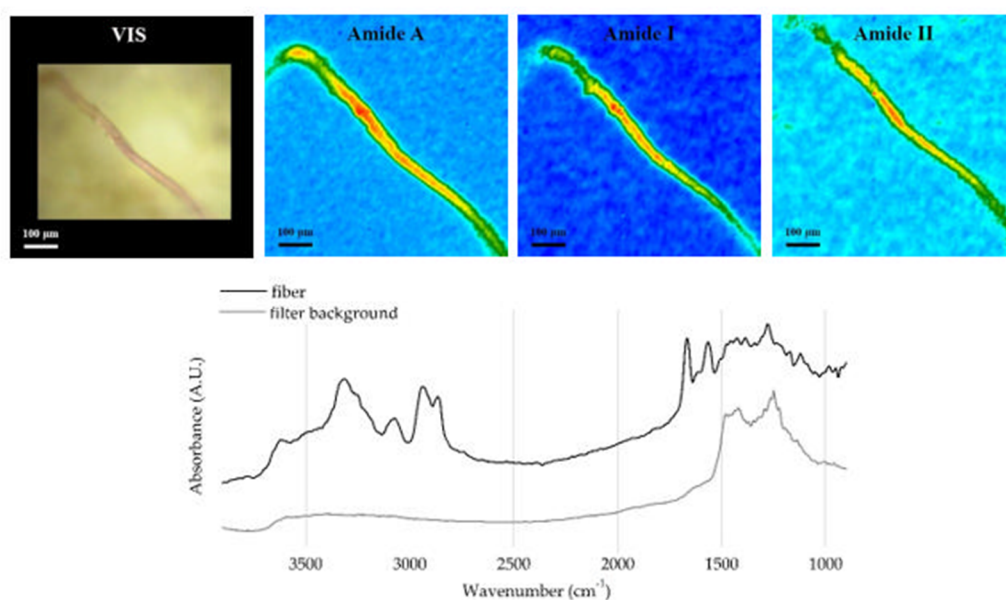

**Figure S2.** (From the left) Visible light and 2D FTIR Imaging maps of a fiber identified as polyamide (PA) owing to absorption 3306 cm<sup>-1</sup> (Amide A), 3063 cm<sup>-1</sup> (asymmetric CH stretching), 3000-2800 cm<sup>-1</sup> (CH stretching), 1671 cm<sup>-1</sup> (Amide I), 1565 cm<sup>-1</sup> (Amide II), 1284 cm<sup>-1</sup> (NH bending, C-N stretching), and 1172 cm<sup>-1</sup> (CH<sub>2</sub> bending) [91]. (Bottom) FTIR Reflectance spectra of the polymer fiber and of the filter background, relating to a single pixel (5.5 × 5.5 μm<sup>2</sup>) of the 2D Imaging map.

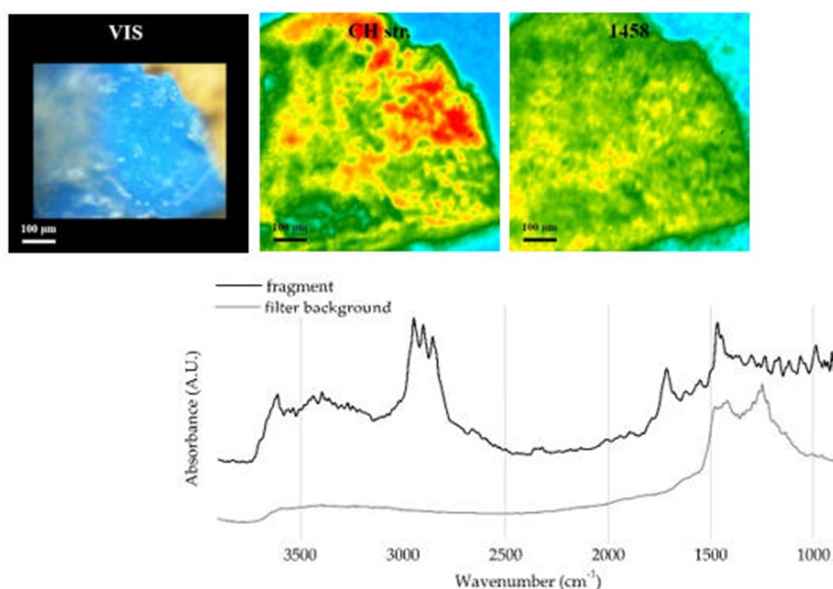

**Figure S3.** (From the left) Visible light and 2D FTIR Imaging maps of a fragment identified as polyethylene (PE) owing to absorption 2950-2800 cm<sup>-1</sup> (CH stretching), 1715 cm<sup>-1</sup> (C=O stretching, probably due to oxidation), 1458 cm<sup>-1</sup> (CH<sub>2</sub> bending), and 1166 cm<sup>-1</sup> (wagging deformation) [91,92]. (Bottom) FTIR Reflectance spectra of the polymer fragment and of the filter background, relating to a single pixel (5.5 × 5.5 μm<sup>2</sup>) of the 2D Imaging map.

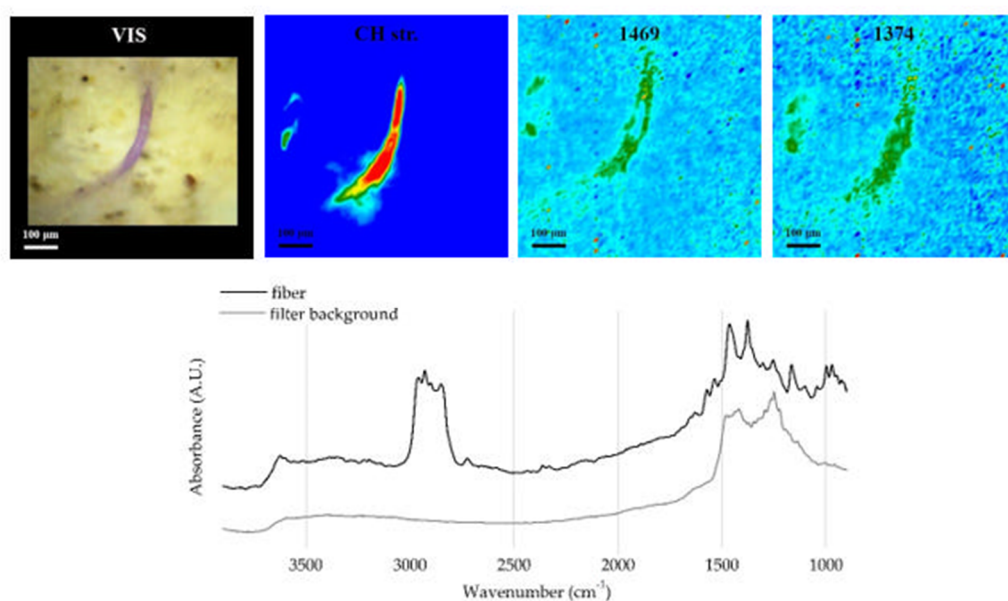

**Figure S4.** (From the left) Visible light and 2D FTIR Imaging maps of a fiber identified as polypropylene (PP) owing to absorption 3000-2800 cm<sup>-1</sup> (CH stretching), 1715 cm<sup>-1</sup> (C=O stretching, probably due to oxidation), 1469 cm<sup>-1</sup> (CH<sub>2</sub> bending), 1374 cm<sup>-1</sup> (CH<sub>3</sub> bending), 1253 cm<sup>-1</sup> (CH<sub>2</sub> twist) and 1170 cm<sup>-1</sup> (CH bending, CH<sub>3</sub> rocking, C-C stretching) [91,92]. (Bottom) FTIR Reflectance spectra of the polymer fiber and of the filter background, relating to a single pixel (5.5 × 5.5 μm<sup>2</sup>) of the 2D Imaging map.

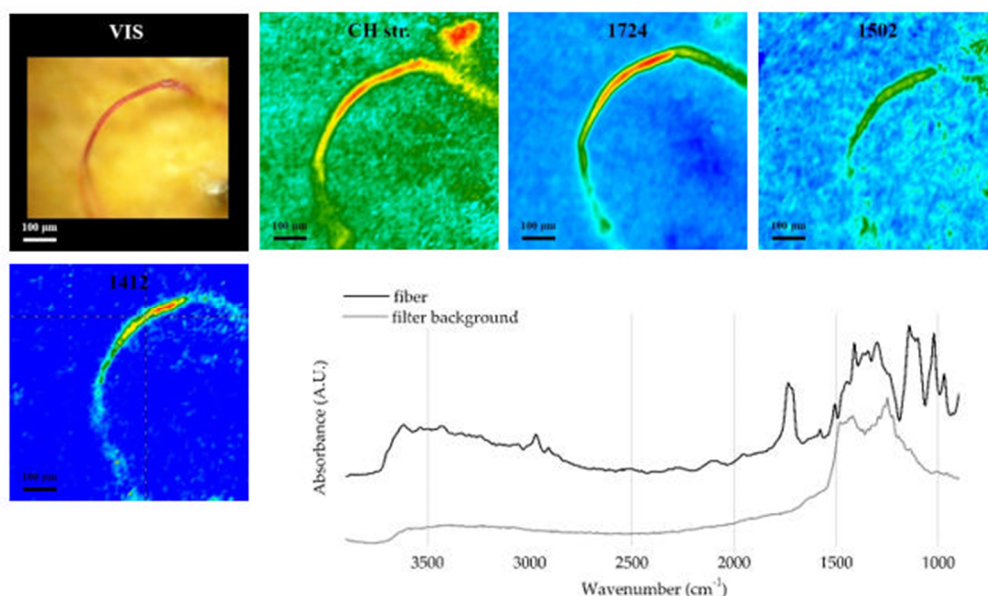

**Figure S5.** (From the left) Visible light and 2D FTIR Imaging maps of a fiber identified as polyethylene terephthalate (PET) owing to absorption 3000-2950  $\text{cm}^{-1}$  (CH stretching), 1724  $\text{cm}^{-1}$  (C=O stretching), 1571 and 1502  $\text{cm}^{-1}$  (vibrations aromatic skeleton with stretching C=C), 1412  $\text{cm}^{-1}$  (stretching of the C-O group deformation of the O-H group, and bending and wagging vibrational modes of the ethylene glycol segment), 1297 and 1141  $\text{cm}^{-1}$  (terephthalate Group  $\text{OOCCH}_4\text{-COO}$ ) [91]. (Bottom) FTIR Reflectance spectra of the polymer fiber and of the filter background, relating to a single pixel ( $5.5 \times 5.5 \mu\text{m}^2$ ) of the 2D Imaging map.

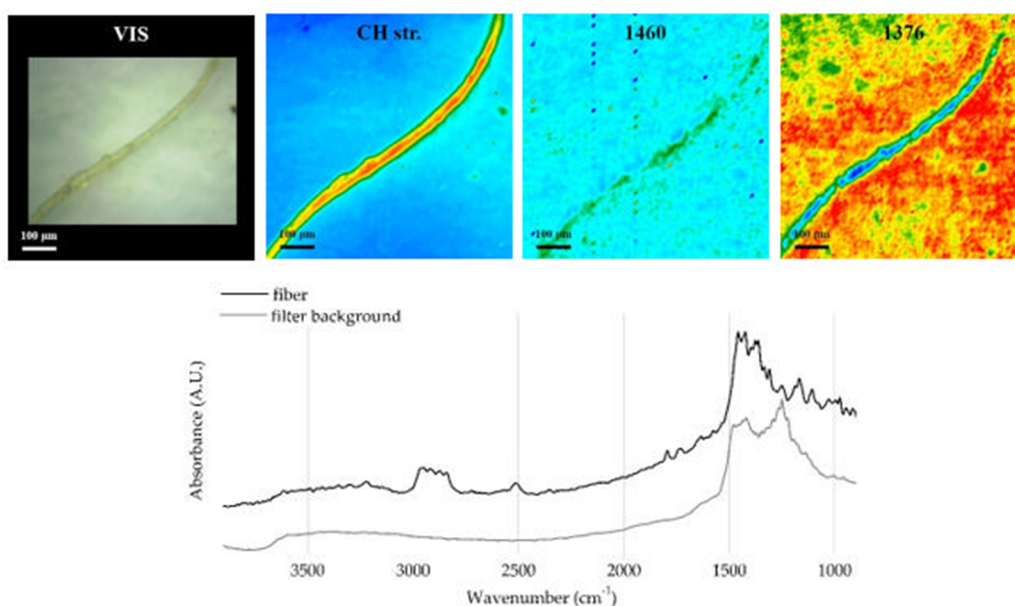

**Figure S6.** (From the left) Visible light and 2D FTIR Imaging maps of a fiber identified as polymeric blend of polypropylene and polyethylene (PE/PP) owing to absorption 3000-2800  $\text{cm}^{-1}$  (CH stretching), 1791  $\text{cm}^{-1}$  (C=O stretching probably due to oxidation), 1460  $\text{cm}^{-1}$  ( $\text{CH}_2$  bending), and 1376  $\text{cm}^{-1}$  ( $\text{CH}_3$  bending) [91]. (Bottom) FTIR Reflectance spectra of the polymer fiber and of the filter background, relating to a single pixel ( $5.5 \times 5.5 \mu\text{m}^2$ ) of the 2D Imaging map.

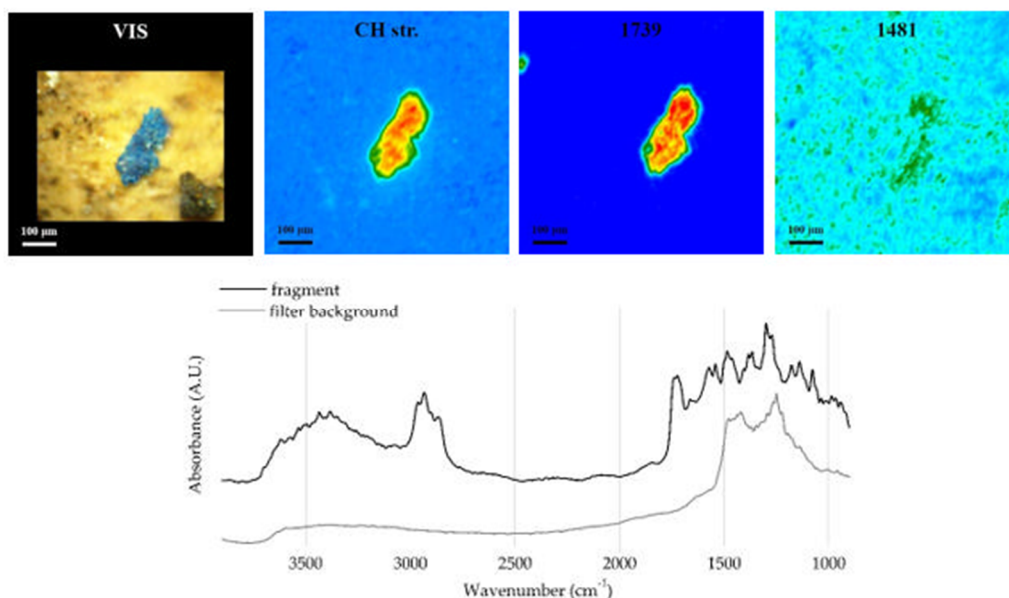

**Figure S7.** (From the left) Visible light and 2D FTIR Imaging maps of a fragment identified as ethylene-vinyl acetate (EVA) owing to absorption  $\sim 3300\text{ cm}^{-1}$  (OH stretching),  $3000\text{--}2850\text{ cm}^{-1}$  (CH stretching),  $1739\text{ cm}^{-1}$  (C=O stretching),  $1481\text{ cm}^{-1}$  (CH<sub>2</sub> and CH<sub>3</sub> bending),  $1389\text{ cm}^{-1}$  (CH<sub>3</sub> bending),  $1281\text{ cm}^{-1}$  (C(=O)O stretching) [91]. (Bottom) FTIR Reflectance spectra of the polymer fragment and of the filter background, relating to a single pixel ( $5.5 \times 5.5\text{ }\mu\text{m}^2$ ) of the 2D Imaging map.

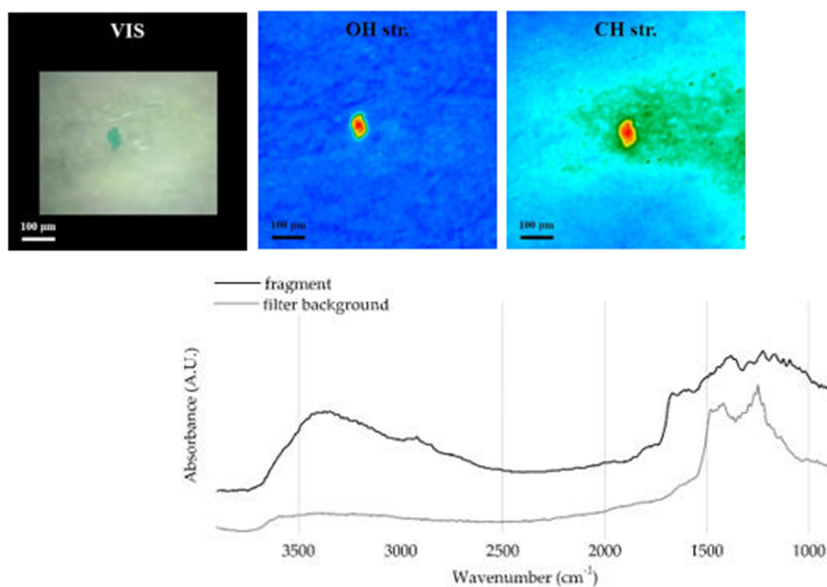

**Figure S8.** (From the left) Visible light and 2D FTIR Imaging maps of a fragment identified as polysaccharide gum owing to absorption  $\sim 3500\text{ cm}^{-1}$  (OH stretching),  $3000\text{--}2800\text{ cm}^{-1}$  (C=O stretching),  $1674$  and  $1580\text{ cm}^{-1}$  (C=C stretching), and  $1382\text{ cm}^{-1}$  (CH bending) [93,94]. Although the similarity with the cellulose spectrum, the shape of the item and the presence of several functional groups allowed the above-mentioned polymeric assignment. (Bottom) FTIR Reflectance spectra of the polymer fragment and of the filter background, relating to a single pixel ( $5.5 \times 5.5\text{ }\mu\text{m}^2$ ) of the 2D Imaging map.



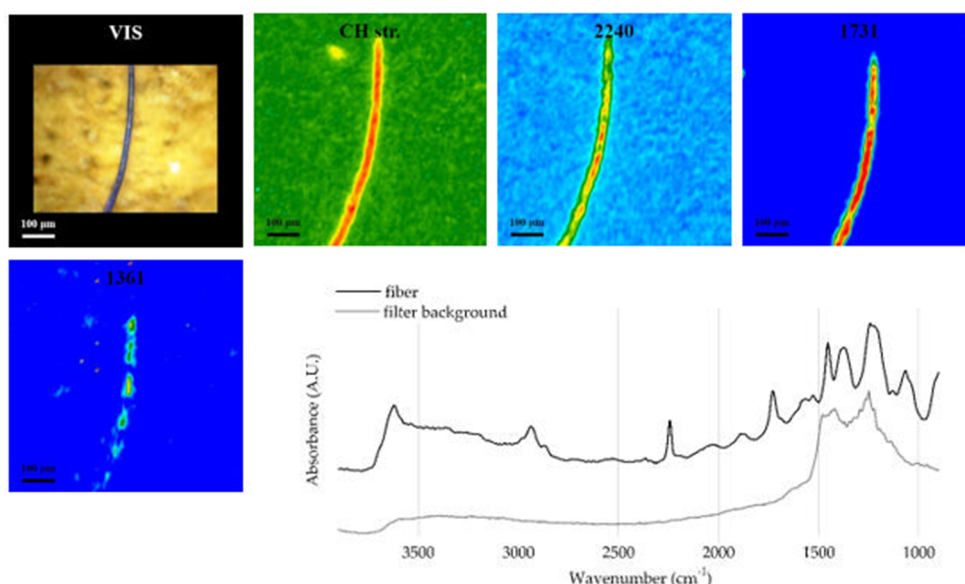

**Figure S9.** (From the left) Visible light and 2D FTIR Imaging maps of a fiber identified as polyacrylonitrile (PAN) owing to absorption  $2930$  and  $2872\text{ cm}^{-1}$  ( $\text{C-H}$  stretching),  $2240\text{ cm}^{-1}$  (CN stretching),  $1731\text{ cm}^{-1}$  ( $\text{C=O}$  stretching probably due to oxidation),  $1455$  and  $1361\text{ cm}^{-1}$  ( $\text{CH}_2$  bending), and  $1068\text{ cm}^{-1}$  ( $\text{CH}$  stretching) [91,95]. (Bottom) FTIR Reflectance spectra of the polymer fiber and of the filter background, relating to a single pixel ( $5.5 \times 5.5\text{ }\mu\text{m}^2$ ) of the 2D Imaging map.

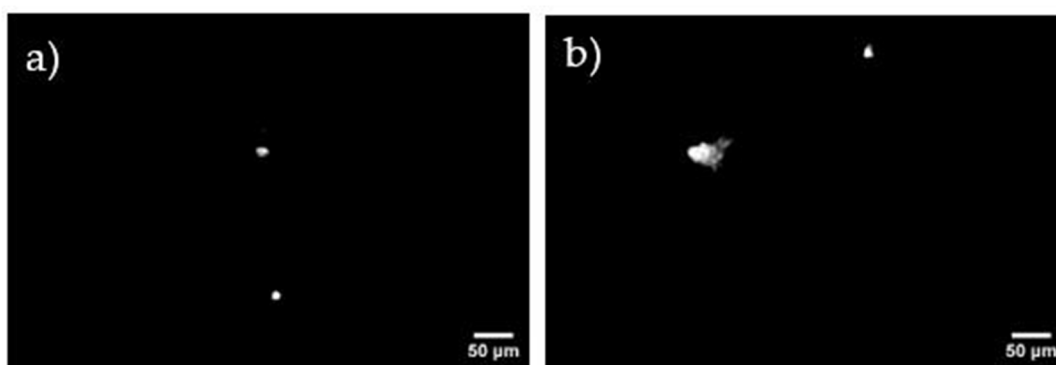

**Figure S10.** Example of a) polymer pellets from the Harpacticoida pool and b) polymer fragment and pellet from the Ostracoda pool visualized at the epifluorescence microscope (ex:  $455\text{--}495\text{ nm}$ ; em:  $515\text{--}625\text{ nm}$ ).

### S11. Micro-computed tomography ( $\mu\text{-CT}$ )

Micro-computed tomography ( $\mu\text{-CT}$ ) analysis was performed on *P. franciscoloi* adult female, approximately  $5\text{ mm}$  in length. The samples were analyzed by collecting  $\mu\text{-CT}$  data using Skyscan 1172 high-resolution microCT. This system has a sealed, microfocus tungsten X-ray tube with a  $5\text{ }\mu\text{m}$  focal spot size. The X-ray was produced by exposing the anode to an electron beam at a range of  $60\text{ kV}$  and  $150\text{ }\mu\text{A}$ . Each sample was placed on a pedestal between the X-ray tube source and the charge-coupled device detector. The 2D X-ray images were captured with a slice-to-slice rotation angle range of  $0.3^\circ$ . The spatial resolution of the images was kept at  $11\text{ }\mu\text{m}$  in terms of pixel size. The 3D image of the object's internal structure was reconstructed using a modified Feldkamp algorithm for cone-beam acquisition geometry, realized in Nrecon v.1.6.3.3 software. The alignment and beam hardening corrections were made before starting the re-construction process. CTVox program was used for 3D visualization, while CT-Analyser (CTan) software was used for the image clean up and measurements.

## Reference

90. Garside, P.; Wyeth, P. Identification of Cellulosic Fibres by FTIR Spectroscopy: Thread and Single Fibre Analysis. *Stud Conserv* 2003, 48, 10.2307/1506916
91. Jung, M.R.; Horgen, F.D.; Orski, S.V.; Rodriguez C.V.; Beers, K.L.; Balazs, G.H.; Jones, T.T.; Work, T.M.; Brignac, K.C.; Royer, S.J.; Hyrenbach, K.D.; Jensen, B.A.; Lynch, J.M. Validation of ATR FT-IR to identify polymers of plastic marine debris, including those ingested by marine organisms. *Mar Pollut Bull* 2018, 127, 704–716. <https://doi.org/10.1016/j.marpolbul.2017.12.061>
92. Wang, C.; Wang, Y.; Dang, Y.; Jiao, Q.; Li, H.; Wu, Q.; Zhao, Y. Synthesis of a novel titanium complex catalyst and its catalytic performance for olefin polymerization. *Russ J Appl Chem* 2015, 88, 1723–1727. <https://doi.org/10.1134/S1070427215100262>
93. Faria, S.; De Oliveira Petkowicz, C.L.; De Morais, S.A.L.; Terrones, M.G.H.; De Resende, M.M.; De Frana, F.P.; Cardoso, V.L. Characterization of xanthan gum produced from sugar cane broth. *Carbohydr Polym* 2011, 86, 469–476. <https://doi.org/10.1016/j.carbpol.2011.04.063>
94. Hong, T. Nie, S.-P.; Xie, M.-Y. Applications of infrared spectroscopy in polysaccharide structural analysis: Progress, challenge and perspective. *Food Chem* 2012, 12, 100168. <https://doi.org/10.1016/j.fochx.2021.100168>
95. Mizher, R.M.; H. Adawiya, J.; Naser, J.Z.; Wee, T.T.; Zaki B, A.R.M.; Bin, K.A. Synthesis and characterization of grafted Ac-rylonitrile on Polystyrene modified with carbon nanotubes using Gamma-irradiation. *Res J Chem Sci* 2012, 2, 790-795. 10.5897/SRE11.1286
